# Supplementary material for: Ultrafine CuO nanoparticles isolated by ordered mesoporous carbon for catalysis and electroanalysis
Source: Royal Society of Chemistry journal article supplement (doi:10.1039/c3ta12927f), 2013-01-01
Supplement: c3ta12927f.pdf [file c3ta12927f.pdf]

## Supporting Information

# Ultrafine CuO nanoparticles isolated by ordered mesoporous carbon for catalysis and electroanalysis

Hongmin Wu, Shenghai Zhou, Ying Wu, Wenbo Song\*

*College of Chemistry, Jilin University, Changchun 130012, China*

*\* Corresponding author. Tel: +86-431-85168352; Fax: +86-431-85168420*

*E-mail address: [wbsong@jlu.edu.cn](mailto:wbsong@jlu.edu.cn) (W. Song)*

**\*To whom correspondence should be addressed.**

**Prof. Wenbo Song**  
**College of Chemistry,**  
**Jilin University,**  
**Changchun 130012, P.R. China**  
**Email: [wbsong@jlu.edu.cn](mailto:wbsong@jlu.edu.cn)**

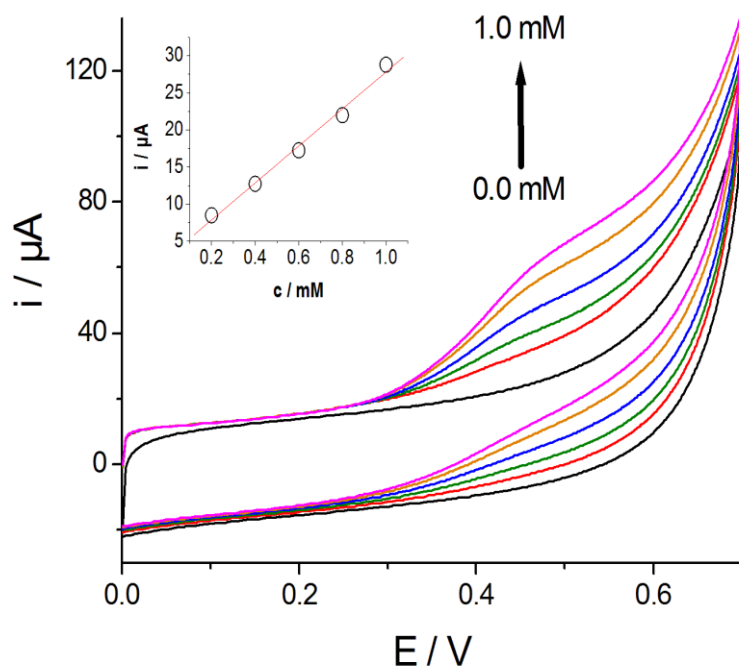

**Fig. S1.** CVs of UCNs@OMC/GCE recorded in 0.1M NaOH containing 0.0, 0.2, 0.4, 0.6, 0.8 and 1.0 mM glucose, respectively. Inset: plot of oxidative peak current with concentration.

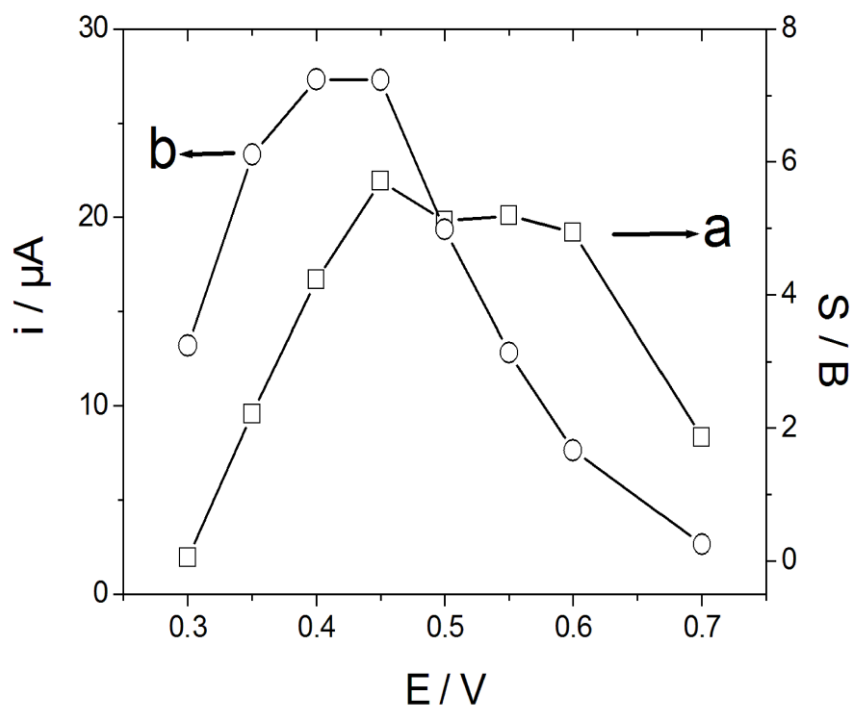

**Fig. S2.** Plots of oxidation current (a) and signal-to-background ratio (b) to the applied potential at UCNs@OMC/GCE measured by chronoamperometry.

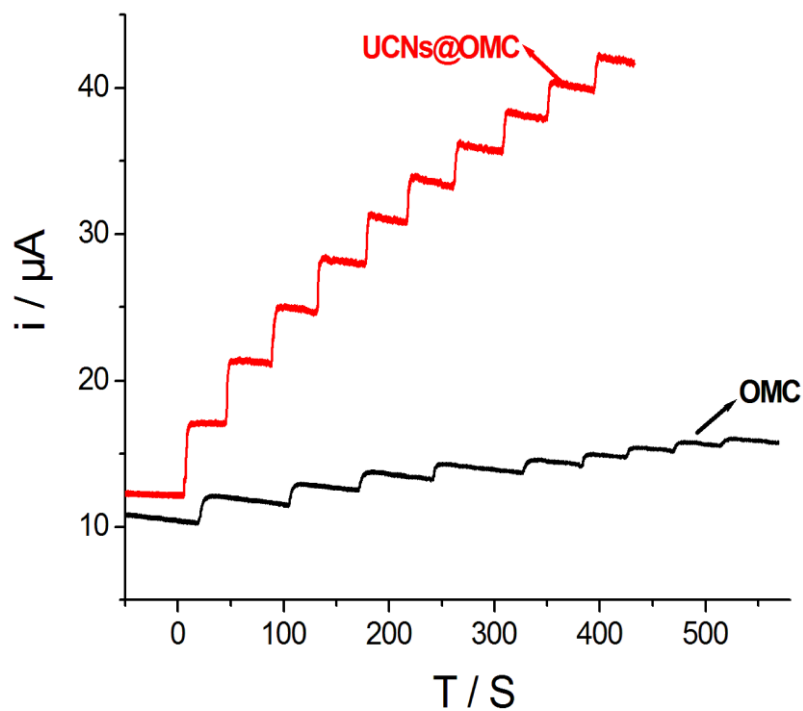

**Fig. S3.** Compared current responses at +0.45V by successive addition of 0.1 mM glucose into 0.1M NaOH at UCNs@OMC/GCE and OMC/GCE.

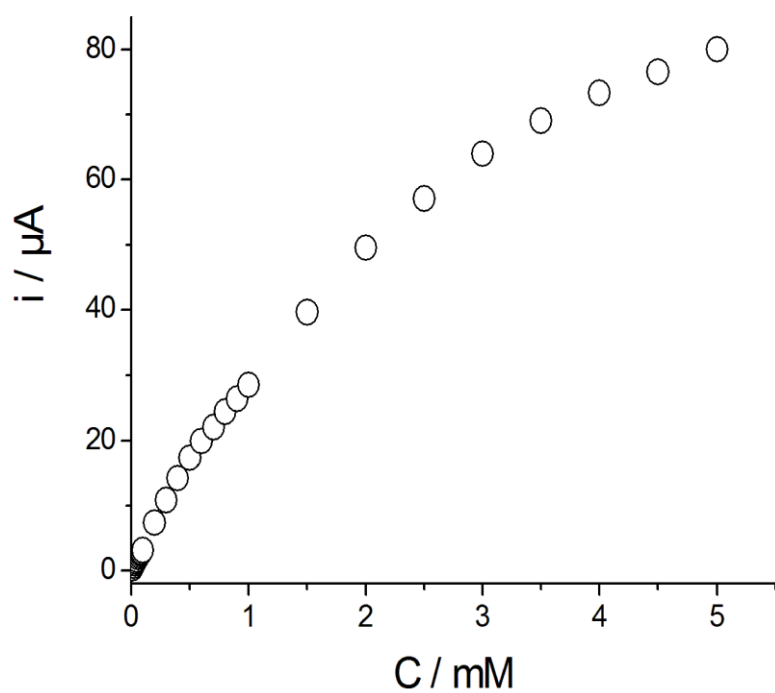

**Fig. S4.** Calibration curve for amperometric response of glucose at UCNs@OMC/GCE.

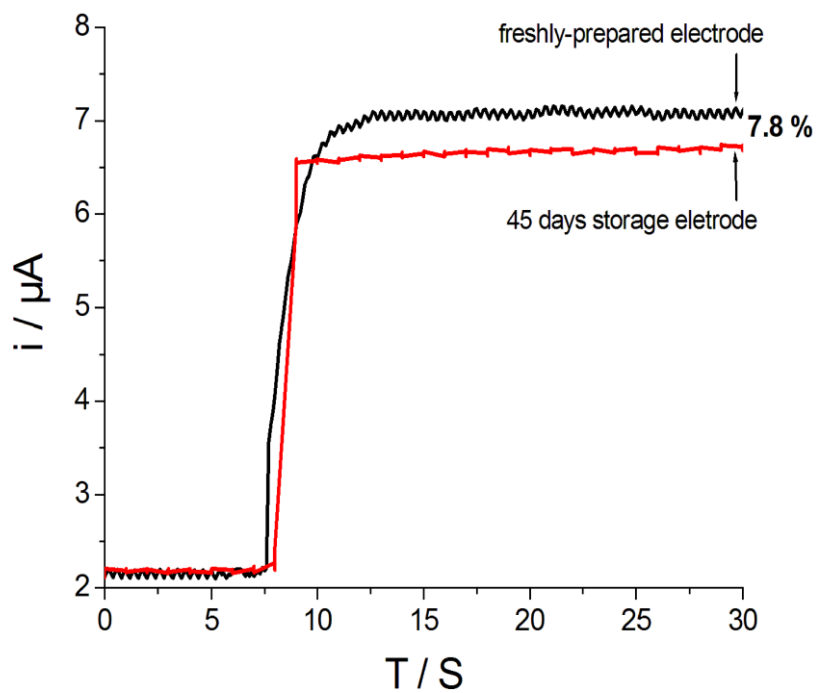

Fig.S5. Compared current responses of 0.1 mM glucose in 0.1M NaOH at +0.45V at the freshly-prepared UCNs@OMC/GCE and the one after 45 days storage.

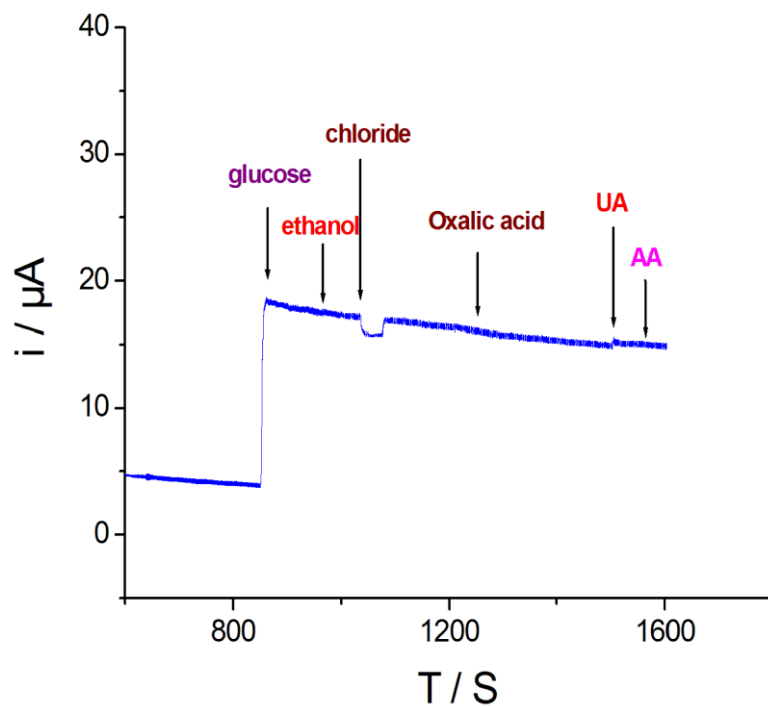

**Fig. S6.** Amperometric responses to successive addition of 0.3 mM glucose, 1.0 mM ethanol, 1.0 mM sodium chloride, 1.0 mM oxalic acid, 0.01 mM UA and 0.01 mM AA in 0.1 M NaOH at UCNs@OMC/GCE.

**Table S1** Reproducibility of glucose oxidation (0.6 mM) in 0.1M NaOH at +0.45V measured at five identically fabricated UCNs@OMC/GCE.

| electrode                | 1    | 2    | 3    | 4    | 5    | RSD  |
|--------------------------|------|------|------|------|------|------|
| Current( $\mu\text{A}$ ) | 19.5 | 20.2 | 20.7 | 19.9 | 20.4 | 4.6% |
